# Supplementary material for: Association of colitis with gut-microbiota dysbiosis in clathrin adapter AP-1B knockout mice
Source: PubMed Central journal article supplement (PMC7093000; doi:10.1371/journal.pone.0228358), 2020-03-24

Figure A

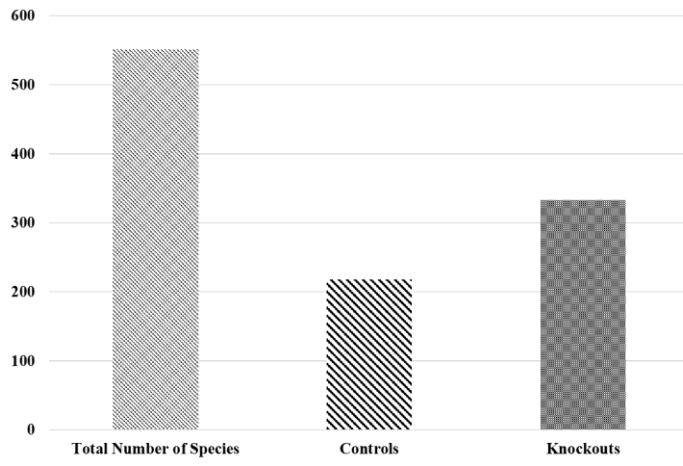

Figure B

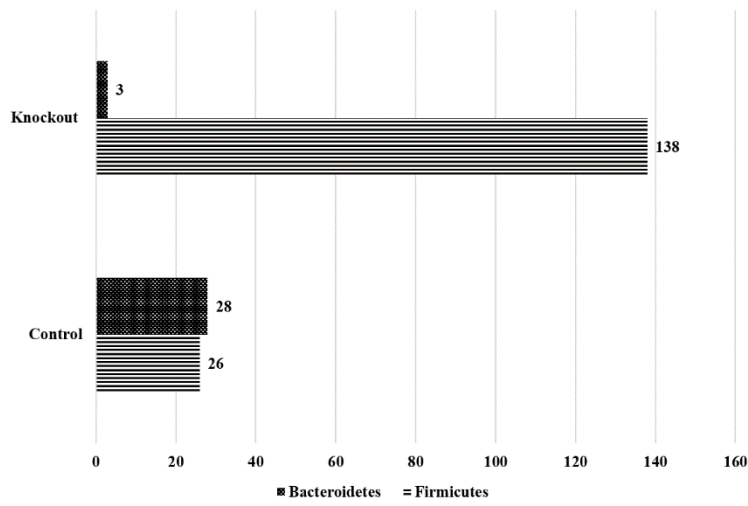

Supplement: pone.0228358.s003.pdf [file pone.0228358.s003.pdf]
