# Supplementary material for: Association of colitis with gut-microbiota dysbiosis in clathrin adapter AP-1B knockout mice
Source: PLoS One. 2020 Mar 24;15(3):e0228358. doi: 10.1371/journal.pone.0228358 (PMC7093000; doi:10.1371/journal.pone.0228358)
Supplement: S5 Table — (XLSX) [file pone.0228358.s009.xlsx]

## Sheet: Sheet1
S5 Table. Details of the roles of significantly altered functions across CO & KO groups.
Microbiome Functions	CO	KO	Correlation to colitis phenotype
Oxidative stress & Nitrosative stress resistance significantly increased in KO mice group
Oxidative stress [2, 3]	ENOG41125EY, COG0450, ENOG410YVS9, ENOG4112704	COG0260, ENOG4111TDN, ENOG4111IWY, ENOG4111UEA, COG1233, ENOG410ZDRF, COG2344, ENOG41123KF, ENOG4111K4T, ENOG410XVW8, ENOG4111KHV, ENOG4111QAE	During colitis condition mice gut is exposed to oxidative and nitrosative stress, these enzymes regulate oxidative stress and nitrosative stress in bacteria
Nitrosative stress [4]		COG1017, ENOG410ZDRF(repeated)
Transporters significantly increased in KO mice group, i.e. more nutrient uptake in KO mice group
Iron Uptake/transporters [5]	ENOG410Y9WS	ENOG410ZNX6, ENOG410ZJX3, ENOG410YNPF, ENOG410YAIR, ENOG410YB7D, ENOG4110QZN, ENOG410YB3G, ENOG410XQAZ, ENOG4111JQD, ENOG4111HM8, ENOG410ZPJF, ENOG410YDBU	Anemia is a phenotype of colitis, increased iron uptake leads to anemic condition in host
Amino acid transporters [6]		COG2610, COG0411, ENOG4111GBW	Bacteria under an inflammatory state usually have a weak capacity to make nutrients on their own. To overcome the problem of nutrient deficiency, the bacteria instead transport them from the available environment through means such as tissue destruction or from the sites of inflammation.
Carbohydrate transporters	ENOG410ZVEB	ENOG410ZWA1, ENOG410XSHZ, ENOG410XNZG, ENOG41105XQ, ENOG410YA44
ABC transporters		COG0614, ENOG410ZUAG, ENOG410XPKQ, ENOG410XQ2F, ENOG410XQUM
Calcium ion transport/Hydrogen transport		COG0387
Ammonium transporter	COG0004		Inconclusive
Formate transmembrane transporter	COG2116
Mucin degradation related genes significantly found to increase in KO mice group, may further reduce mucins in inflamed gut
Mucin degradation [7]		COG4724, COG4193, COG0363	Degrade mucins from colonic epithelium
SusD family [7]		ENOG410YEJG
Glycosyl hydrolase [8]		ENOG411272W	Involve in degradation of mucin O-linked glycans
Amino acid metabolism
Proline biosysthesis [9]	COG0014		Known to sustain intestinal stability and defend against IBD, genes are significantly increased in CO as compared to KO
Histidine biosynthesis [9]	COG0040, COG1387		Histidine supplementation improved colitis condition in an IL-10-deficient cell transfer model of Crohn’s disease, similarly we found histidine biosynthesis genes increased in CO as compared to KO
Amidohydrolase (Histidine catabolic process)		COG1228	In KO mice group, host gut is already inflamed, any further histidine degradation might aggravate colitis.
Arginine metabolic process/ Amoebiasis (05146)/catabolic activity		COG0010	Amoebiasis is Gastroenteritis, leading to diarrhoea, caused by parasitic infection. Similar gene may aggravate colitis in KO mice group.
			Information retrieved from KEGG pathway 05146
Arginine dihydrolase [9] (arginine degradation)		COG2235	In KO mice arginine degradation is enhanced. However, arginine supplementation has been demonstrated to maintain normal intestinal physiology and promote mucosal healing when inflammation affects the intestine.
Phyenylalanine, tyrosine and tryptophan biosysthesis [10] ≠	COG0512	COG1465, COG4401	Phenylalanine has been reported to be persistently up-regulated and positively correlated with tyrosine in IBD patients even during induction of remission, especially in patients with CD
Phenylalanine metabolism [10] ≠		COG1473
Tryptophan RNA-binding attenuator protein (Regulate tryptophan metabolism)		ENOG411234W
Lysine biosynthesis [11]		COG0329, ENOG410ZK6H	In pediatric IBD patients, it has been reported that lysine increased in fecal amino acid composition.
Carbohydrate Metabolism
Metabolize complex sugars	COG1621, COG3345, COG2730, COG0296, COG3867		In CO group, the metabolic capacity of bacteria remains high, that’s why gut microbiome are able to metabolize both complex as well as simple sugar. Although in microenvironment of inflamed gut, resident microbiome may express genes that are capable of metabolizing simple sugars only as in KO mice group.
Metabolize simple sugars	COG0191, COG0153, ENOG4111X3Y, ENOG410XV9T	COG0149, COG0158, ENOG4111F99, ENOG410XQWR
Cell Motility
Cell motility[12, 13]		COG1724	In previous IBD studies on T-bet−/− Rag2−/−, resulting in colitis and TNBS-induced colitis mouse models, an increased capacity for bacterial pathogenesis has been observed. These models are found to exhibit a high abundance of genes related to cell motility.
Biofilm formation		COG1734, ENOG4111QHP	Essential for pathogenicity
arsR family transcriptional regulator [14]		ENOG410XUWM	Members of this family reported to involve in biofilm formation and virulence
Protein phosphorylation (serine protein kinase)		COG2766	Regulate several processes including cell-cell communication i.e. biofilm formation
Protein kinase		ENOG410ZN6D
Sulfur metabolism
Sulfur metabolism, hydrogen sulfide biosynthetic process[15, 16]		COG0155	Excessive hydrogen sulfide (H2S) production is reported in colitis condition, found to increase in KO mice group
Methane metabolism
Methane metabolism[17]		COG1456	Increased methane production is reported in IBD patients, found to increase in KO mice group.
Restriction modification system is a robust system that provide defense to bacteria from viral DNA infection. KO mice group loose this defense system as compared to CO.
Restriction modification system related COGs [18] (prevent foreign (viral) DNA to invade or infect the bacterial cell)	ENOG410ZVHQ, ENOG410Z7SX, COG1401, COG4268, ENOG410YBMI, ENOG4111V23, COG4823, ENOG410XV7B, ENOG410YTH4, ENOG410ZVTA	ENOG411245M, ENOG410ZYXE, ENOG410YFNS	Colitis phenotype often associated with increased abundance of bacteriophages.
Cell wall biosynthesis a
Alanine racemase (catalyzes L-alanine to D-alanine)		COG3616	Peptidoglycan biosynthesis
dTDP-4-dehydrorhamnose reductase	COG1091		Participate in biosynthesis of the dTDP-L-rhamnose which is an important component of lipopolysaccharide (LPS)
Glycosyl transferase	ENOG4111IEG, ENOG4111TT7, ENOG410ZVFD, ENOG4111SQ1, ENOG4111TNE, ENOG411290R, ENOG4111WRY, ENOG410ZWI8, ENOG410ZVET, ENOG410ZVJG	ENOG410Y5QZ, ENOG410Y03U, ENOG4111FP0	Involved in cell wall formation
Cell wall formation (Adds enolpyruvyl to UDP-N- acetylglucosamine)	COG0766		Cell wall biosynthesis
Teichoic acid biosynthesis protein A (found within the cell wall of most Gram-positive bacteria)	ENOG4112B0N		Cell wall biosynthesis
Glycerolipid metabolism	COG3345 (repeated)	ENOG410XQJ1	Provide precursors for cell wall synthesis
Outer membrane assembly protein (found in gram-negative bacteria)		ENOG410XQ8P	Cell wall biosynthesis
Penicillin-binding protein 1C (peptidoglycan biosynthesis)		COG4953	Cell wall biosynthesis
Nad-dependent epimerase dehydratase ( involve in lipopolysaccharide biosynthesis)		ENOG4111J45	Cell wall biosynthesis
Cell wall resistance gene found to increase in KO mice group
Capsule polysaccharide		COG3563	Important virulence factor for many pathogens
Spore coat protein		ENOG4111IEQ, ENOG4111KT8, ENOG41123YA	Confers resistance to peptidoglycan-breaking enzymes and noxious chemicals in KO mice group
Fatty acid metabolism a
Fatty acid biosynthesis	COG0332
Lipid biosysthesis (synthesize molecules that are typically precursors to membrane phospholipids)	COG0615
Nucleic acid metabolism a
Pyrimidine metabolism (Tetrahydrofolate is a co-factor which is needed for the de-novo synthesis of thymidine monophosphate, required for the biosynthesis of bacterial DNA and RNA)		COG1351	Required for nucleic acid synthesis
Pyrimidine metabolism, Salvage pathway of pyrimidine, the catabolic breakdown and recycling of nucleoside compounds		COG0295	Required for nucleic acid synthesis
Phosphonoacetate hydrolase (phosphonoacetate + H2O -> acetate + phosphate)		COG2824	Phosphate required for nucleic acid synthesis
DNA Replication & Repair a
DNA Replication	COG0553	COG0328, COG1372, COG0358, COG0593, ENOG410ZJKI	DNA Synthesis
RNA Biosynthesis Process		ENOG410ZNQ9	RNA Synthesis
tRNA maturation		COG0689
Transposase		ENOG410XT7Q, ENOG410ZXW1, ENOG4111GFI, COG2963, ENOG4111WA6, ENOG410ZUF1, COG1484, ENOG4111M0T, COG5659
DNA Repair	COG0350, COG0648	COG1197, COG0322,COG4294, ENOG410ZZVS, ENOG410YJ72
Antibiotic Resistance found to increase in KO mice group.
Establishment of competence for transformation (The process in which a naturally transformable bacterium acquires the ability to take up exogenous DNA. Competence allows for rapid adaptation and DNA repair of the cell) # [19]		COG4940	Horizontal gene transfer is a potential source of antibiotic resistance genes transfer
Conjugative transposition [19]		ENOG410ZKPD
RNA methylase (methylation, RNA function and antibiotic resistance)		ENOG4111FKJ	Antibiotic resistance
Regulator of multiple antibiotic resistance		ENOG4111TDN(repeat), ENOG4111IWY(repeat),COG4189	Antibiotic resistance
Multidrug Resistance protein	COG2076		Antibiotic resistance
Transcriptional regulator, TetR family	ENOG4111T38	ENOG4111NTM, ENOG41110YX	Antibiotic resistance
Beta-lactamase [20]		ENOG410ZWUI	Antibiotic resistance, often known to aggravate colitis
PemK-like protein, Transcriptional modulator of MazE toxin, MazF [21]		ENOG410ZMEC, ENOG4111SRX	Stabilize plasmids that carry drug-resistance determinants in important pathogens
Energy production related genes significantly increased in KO mice group b
Biotin metabolism (00780)		COG1424	Coenzyme in carboxylation reactions
Nicotinate and nicotinamide metabolism (00760)	COG2816		Serve as coenzyme in oxidation-reduction reactions
Electron transport and ATP synthesis	ENOG410ZB0Z, ENOG4111NY9, COG1139, COG1773, ENOG41120JQ	COG0043, COG0163, ENOG410XRT9, COG1304, ENOG4111I9P	Energy Production
Oxidation-reduction process		COG1012, COG2055, ENOG410XS3N, COG1062	Energy Production
Energy derivation by oxidation of organic compounds		COG1892	Energy Production
Citrate lyase is an enzyme which converts citrate to oxaloacetate. (citrate fermentation -> ultimately convert into D-lactate)		COG3052	Energy Production
COGs/NOGs involved in regulatory processes, mainly found increased in CO mice group c
Positive regulation of carbohydrate metabolic process	COG2909
Nucleotide-binding protein, involve in regulatory processes	COG4271
Regulation of bacterial Mg2+ homeostasis	COG0336
Regulation of cell autolysis	ENOG410XW9I
Ubiquitin mediated proteolysis (04120)	COG0476		Degrade misfolded proteins
N-End Rule protein degradation	COG2360, COG2127	COG1067
Biological regulation (Serine threonine protein kinase)	COG0515
Intracellular signal transduction	ENOG41101BA
Sulfur relay system (04122)	COG0607, ENOG410XPIQ		Cell redox homeostatsis, Thiamin biosynthesis
Cobalamin biosynthesis	COG1492		Interamolecular rearrangements (for ex, methyl group transfer during methionine synthesis)
Regulation of RNA biosynthetic process	ENOG410XRI9
Unknown	ENOG4111YI0, ENOG410XYYF	ENOG410Y8FZ, ENOG410YX0Q ENOG4111XP0
≠ Phenylalanine was persistently up-regulated and positively correlated with tyrosine in IBD patients even during induction of remission, especially in patients with CD. However, the pattern of increased aromatic amino acids (e.g. phenylalanine and tyrosine) and a decrease in branched chain amino acids (e.g. valine) is well known during catabolic conditions like sepsis and liver failure[10].
# The phenomenon of natural transformation has enabled bacterial populations to overcome great fluctuations in population dynamics and overcome the challenge of maintaining the population numbers during harsh and extreme environmental changes. During such conditions some bacterial genera spontaneously release DNA from the cells into the environment free to be taken up by the competent cells. The …
a Our results have also demonstrated significant changes in various other pathways and gene abundances between the CO and KO groups. For example, the genes associated with “lipid metabolism” and “cell wall/membrane/envelope biogenesis” were found to be decreased while those related to “replication, recombination and repair” and “nucleotide transport and metabolism” were found to be increased in t…
b Energy production related genes are significantly increased in KO mice group. In KO mice group, different transporters are found to increase indicating increased requirement of nutrient uptake. We hypothesize that more energy will be required for active nutrient transportation resulting into increased energy production in KO.
c Mentioned genes are although involved in several regulatory processes, however, involvement of these genes remain inconclusive in colitis phenotype
References
1	Takahashi D, Hase K, Kimura S, Nakatsu F, Ohmae M, Mandai Y, et al. The epithelia-specific membrane trafficking factor AP-1B controls gut immune homeostasis in mice. Gastroenterology. 2011;141(2):621-632. pmid: 21669204
2	Körner H, Sofia HJ, Zumft WG. Phylogeny of the bacterial superfamily of Crp-Fnr transcription regulators: exploiting the metabolic spectrum by controlling alternative gene programs. FEMS Microbiol Rev. 2003;27(5):559-592. pmid: 14638413
3	Sherrill C, Fahey RC. Import and Metabolism of Glutathione by Streptococcus mutans. J Bacteriol. 1998;180(6):1454-1459. pmid: 9515913
4	Balmus I, Ciobica A, Trifan A, Stanciu C. The implications of oxidative stress and antioxidant therapies in Inflammatory Bowel Disease: Clinical aspects and animal models. Saudi J Gastoenterol. 2016;22(1):3-17. pmid: 26831601
5	Kaitha S, Bashir M, Ali T. Iron deficiency anemia in inflammatory bowel disease. World J Gastrointest Pathophysiol. 2015;6:62–72. pmid: 26301120
6	Morgan XC, Tickle TL, Sokol H, Gevers D, Devaney KL, Ward DV, et al. Dysfunction of the intestinal microbiome in inflammatory bowel disease and treatment. Genome Biol. 2012;13(9):R79. pmid: 23013615
7	Martens EC, Koropatkin NM, Smith TJ, Gordon JI. Complex glycan catabolism by the human gut microbiota: the Bacteroidetes Sus-like paradigm. J Biol Chem. 2009;284(37):24673-24677. pmid: 19553672
8	Tailford LE, Crost EH, Kavanaugh D, Juge N. Mucin glycan foraging in the human gut microbiome. Front Genet. 2015;6:81. pmid: 25852737
9	Liu Y, Wang X, Hu C-AA. Therapeutic potential of amino acids in inflammatory bowel disease. Nutrients. 2017;9(9):920. pmid: 28832517
10	Bjerrum JT, Steenholdt C, Ainsworth M, Nielsen OH, Reed MA, Atkins K, et al. Metabonomics uncovers a reversible proatherogenic lipid profile during infliximab therapy of inflammatory bowel disease. BMC Med. 2017;15(1):184. pmid: 29032767
11	Bosch S, Struys EA, van Gaal N, Bakkali A, Jansen EW, Diederen K, et al. Fecal Amino Acid Analysis Can Discriminate De Novo Treatment-Naïve Pediatric Inflammatory Bowel Disease From Controls. J Pediatr Gastroenterol Nutr. 2018;66(5):773-778. pmid: 29112087
12	Rooks MG, Veiga P, Wardwell-Scott LH, Tickle T, Segata N, Michaud M, et al. Gut microbiome composition and function in experimental colitis during active disease and treatment-induced remission. ISME J. 2014;8(7):1403-1417. pmid: 24500617
13	Zheng H, Chen M, Li Y, Wang Y, Wei L, Liao Z, et al. Modulation of gut microbiome composition and function in experimental colitis treated with sulfasalazine. Front Microbiol. 2017;8:1703. pmid: 28936203
14	Wang Q, Chen M, Zhang W. A two-component signal transduction system contributes to the virulence of Riemerella anatipestifer. J Vet Sci. 2018;19(2):260-270. pmid: 29284206
15	Bhatia M. H2S and Inflammation: An Overview. In: Moore PK, Whiteman M, editors. Chemistry, Biochemistry and Pharmacology of Hydrogen Sulfide. Cham: Springer International Publishing; 2015. p. 165-180. pmid: 26162834
16	Szabó C. Hydrogen sulphide and its therapeutic potential. Nat Rev Drug Discov. 2007;6(11):917-35. pmid: 17948022
17	Monasta L, Pierobon C, Princivalle A, Martelossi S, Marcuzzi A, Pasini F, et al. Inflammatory bowel disease and patterns of volatile organic compounds in the exhaled breath of children: A case-control study using Ion Molecule Reaction-Mass Spectrometry. PloS one. 2017;12(8):e0184118. pmid: 28859138
18	Gogokhia L, Buhrke K, Bell R, Hoffman B, Brown DG, Hanke-Gogokhia C, et al. Expansion of bacteriophages is linked to aggravated intestinal inflammation and colitis. Cell Host Microbe. 2019;25(2):285-299. e8. pmid: 30763538
19	Huddleston JR. Horizontal gene transfer in the human gastrointestinal tract: potential spread of antibiotic resistance genes. Infect Drug Resist. 2014;7:167-176. pmid: 25018641
20	Skuja V, Derovs A, Pekarska K, Rudzite D, Lavrinovica E, Piekuse L, et al. Gut colonization with extended-spectrum β-lactamase-producing Enterobacteriaceae may increase disease activity in biologic-naive outpatients with ulcerative colitis: an interim analysis. Eur J Gastroenterol Hepatol. 2018;30(1):92-100. pmid: 29076938
21	Williams JJ, Hergenrother PJ. Artificial activation of toxin–antitoxin systems as an antibacterial strategy. Trends Microbiol. 2012;20(6):291-298. pmid: 22445361
